# Supplementary material for: Two novel nonlinear optical carbonates in the deep-ultraviolet region: KBeCO3F and RbAlCO3F2
Source: PubMed Central journal article supplement — Sci Rep. 2013 Mar 4;3:1366. doi: 10.1038/srep01366 (PMC3586702; doi:10.1038/srep01366), 2013-03-04
Supplement: srep01366-s1.pdf [file srep01366-s1.pdf]

## *Supplementary Information for*

### **Two novel nonlinear optical carbonates in the deep-ultraviolet region: $\text{KBeCO}_3\text{F}$ and $\text{RbAlCO}_3\text{F}_2$**

Lei Kang,<sup>†,¶</sup> Zheshuai Lin,<sup>\*,†</sup> Jingui Qin,<sup>‡</sup> and Chuangtian Chen<sup>†</sup>

<sup>†</sup>Beijing Center for Crystal R&D, Key Lab of Functional Crystals and Laser Technology of Chinese Academy of Sciences, Technical Institute of Physics and Chemistry, Chinese Academy of Sciences, Beijing 100190, PR China

<sup>‡</sup>Department of Chemistry, Wuhan University, Wuhan 430072, PR China

<sup>¶</sup>Graduate School of the Chinese Academy of Sciences, Beijing 100049, PR China

\*E-mail: [zslin@mail.ipc.ac.cn](mailto:zslin@mail.ipc.ac.cn)

## Table of Content

1. Table S1 Crystallographic data for  $\text{KBeCO}_3\text{F}$  and  $\text{RbAlCO}_3\text{F}_2$ .
2. Table S2 Experimental and calculated energy band gaps in the  $\text{MnCO}_3\text{F}$  series.
3. Table S3 Experimental and calculated optical properties in the  $\text{MnCO}_3\text{F}$  series.
4. Figure S1 Electronic properties in the  $\text{MnCO}_3\text{F}$  series.
5. Table S4 Survey for the suitable UV fluoride carbonates in Inorganic Crystal Structure Database.
6. References in the Supplementary Information.

**1. Table S1 Crystallographic data of  $\text{KBeCO}_3\text{F}$  and  $\text{RbAlCO}_3\text{F}_2$ .**

| $\text{KBeCO}_3\text{F}$      |         |         |         | $\text{RbAlCO}_3\text{F}_2$   |                   |         |         |
|-------------------------------|---------|---------|---------|-------------------------------|-------------------|---------|---------|
| Space Group                   | $AMM2$  |         |         | Space Group                   | $P-62C$           |         |         |
| Unit Cell                     | $a$ (Å) | $b$ (Å) | $c$ (Å) | Unit Cell                     | $a$ (Å) = $b$ (Å) | $c$ (Å) |         |
| Parameters                    | 2.9708  | 6.4295  | 8.7801  | Parameters                    | 4.7462            | 11.0805 |         |
| Atomic fractional coordinates | $x/a$   | $y/b$   | $z/c$   | Atomic fractional coordinates | $x/a$             | $y/b$   | $z/c$   |
| K1                            | 0.0     | 0.0     | 0.0     | Rb1                           | 0.0               | 0.0     | 0.5     |
| Be2                           | 0.5     | 0.5     | 0.0925  | Al2                           | 0.66667           | 0.33333 | 0.25    |
| C3                            | 0.5     | 0.5     | 0.8747  | C3                            | 0.33333           | 0.66667 | 0.25    |
| O4                            | 0.5     | 0.5     | 0.7446  | O4                            | 0.35596           | 0.92815 | 0.25    |
| O5                            | 0.5     | 0.3438  | 0.9580  | F5                            | 0.33333           | 0.66667 | 0.60079 |
| F6                            | 0.0     | 0.5     | 0.1776  |                               |                   |         |         |

## 2. Table S2 Experimental and calculated energy band gaps in the $M\text{NCO}_3\text{F}$ series.

Comparison of the experimental and calculated energy band gaps by GGA, PBE0, B3LYP, and sX-LDA XC functionals for the  $M\text{NCO}_3\text{F}$  series (Unit: eV). The experimental values are come from Ref. [1]. It is clear that the PBE0 results match well with the experimental energy gap.

|                                                   | Experimental | Calculated |      |       |        |
|---------------------------------------------------|--------------|------------|------|-------|--------|
|                                                   |              | GGA-PBE    | PBE0 | B3LYP | sX-LDA |
| $\text{KSrCO}_3\text{F}$                          | > 6.2        | 3.80       | 6.27 | 5.79  | 5.72   |
| $\text{RbSrCO}_3\text{F}$                         | > 6.2        | 3.94       | 6.37 | 5.92  | 5.83   |
| $\text{KCaCO}_3\text{F}$                          | > 6.2        | 3.90       | 6.31 | 5.84  | 5.85   |
| $\text{RbCaCO}_3\text{F}$                         | > 6.2        | 3.79       | 6.29 | 5.84  | 5.74   |
| $\text{CsCaCO}_3\text{F}$                         | > 6.2        | 4.21       | 6.39 | 6.17  | 6.14   |
| $\text{Cs}_3\text{Ba}_4(\text{CO}_3)_3\text{F}_5$ | ~ 5.9        | 4.47       | 6.62 | 6.27  | 6.36   |

### 3. Table S3 Experimental and calculated optical properties in the $MNCO_3F$ series.

Experimental and calculated optical properties in the  $MNCO_3F$  series. Experimental values are estimated from the powder SHG measurements in Ref. [1]. The excellent agreement between the experimental and calculated SHG coefficients demonstrates the validity and high precision of our first-principles methods on the UV NLO carbonate crystals.

|                       | Cal. Refractive indices $n$ and birefringence $\Delta n$ |        |            | SHG coefficients (pm/V)            |      |
|-----------------------|----------------------------------------------------------|--------|------------|------------------------------------|------|
|                       | $n_o$                                                    | $n_e$  | $\Delta n$ | Cal.                               | Exp. |
| $KSrCO_3F$            | 1.5316                                                   | 1.4269 | 0.105      | $d_{11} = 1.50$                    | 1.30 |
| $RbSrCO_3F$           | 1.5630                                                   | 1.4610 | 0.102      | $d_{11} = 1.54$                    | 1.30 |
| $KCaCO_3F$            | 1.5303                                                   | 1.4188 | 0.112      | $d_{11} = 1.33$                    | 1.41 |
| $RbCaCO_3F$           | 1.5515                                                   | 1.4360 | 0.116      | $d_{22} = 0.38$                    | 0.43 |
| $CsCaCO_3F$           | 1.5939                                                   | 1.4870 | 0.107      | $d_{22} = 0.43$                    | 0.43 |
| $Cs_3Ba_4(CO_3)_3F_5$ | 1.5742                                                   | 1.6079 | 0.034      | $d_{31} = 0.43$<br>$d_{33} = 0.57$ | 0.47 |

#### 4. Figure S1 Electronic properties in the $M\text{NCO}_3\text{F}$ series.

The total density of states (DOS) and partial DOS (PDOS) of  $\text{RbSrCO}_3\text{F}$ ,  $\text{KCaCO}_3\text{F}$ ,  $\text{RbCaCO}_3\text{F}$ ,  $\text{CsCaCO}_3\text{F}$  and  $\text{Cs}_3\text{Ba}_4(\text{CO}_3)_3\text{F}_5$  crystals. The shadow areas indicate the energy regions occupied by non-bonding states on oxygen atoms. The energy spanning of the non-bonding states is about 2.5eV for all  $M\text{NCO}_3\text{F}$  crystals, except for  $\text{Cs}_3\text{Ba}_4(\text{CO}_3)_3\text{F}_5$  with the value at about 1.0eV. The fewer non-bonding states present in the latter are mainly attributed to the spacing arrangements of the  $\text{CO}_3$  groups which are not flat-lying but standing-on-edge with respect to the overall structural layering.

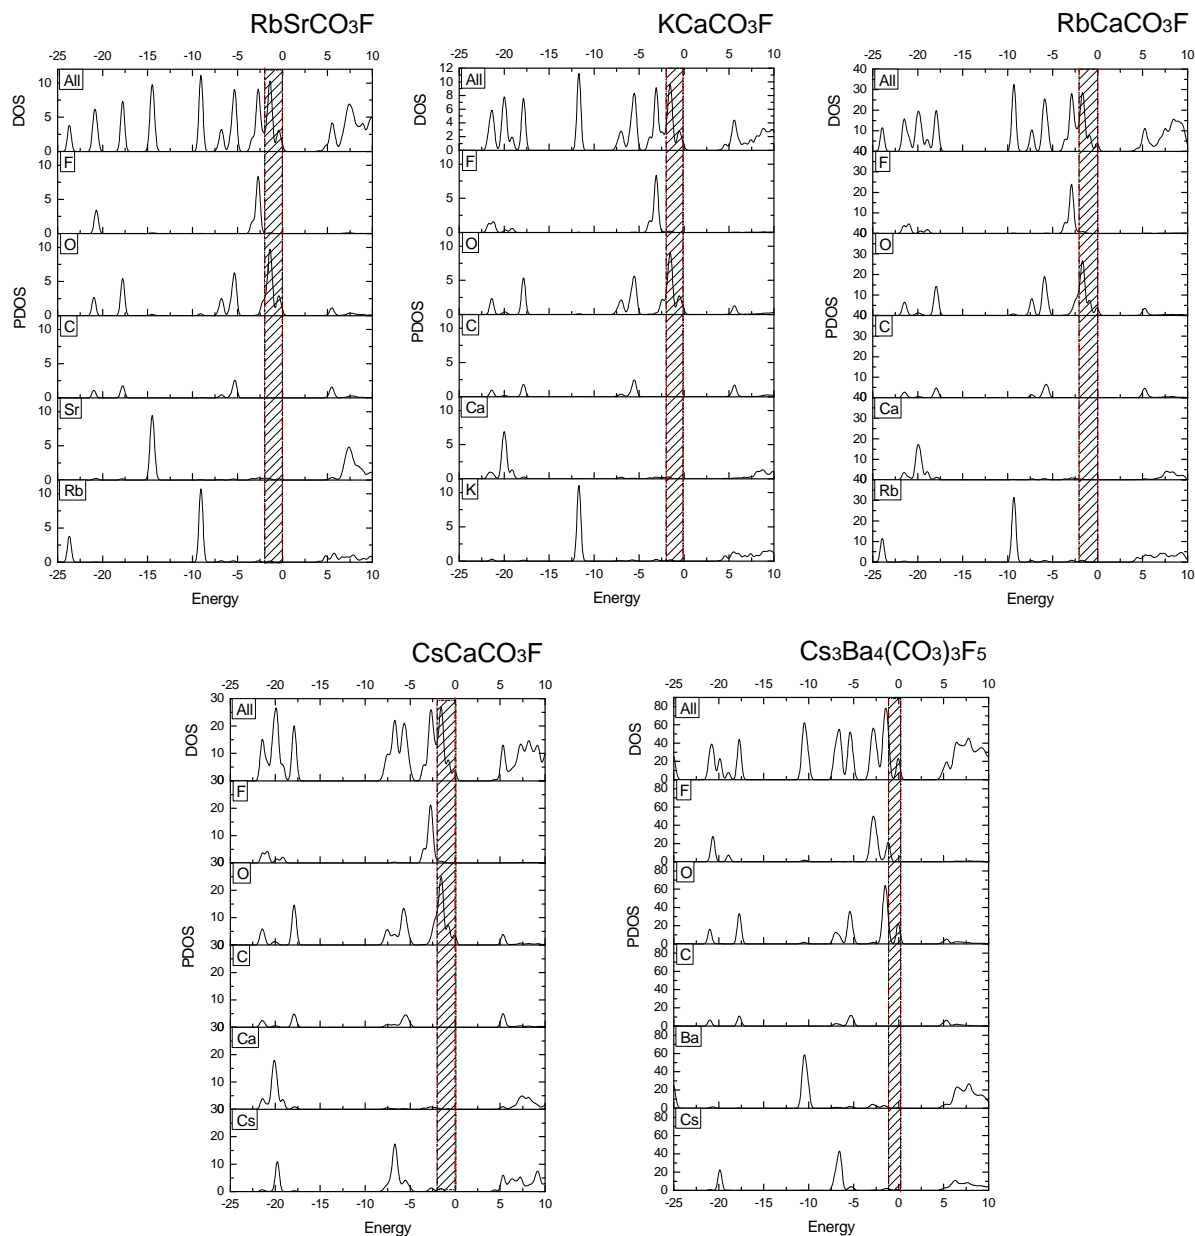

## 5. Table S4 Survey for the suitable UV fluoride carbonates in Inorganic Crystal Structure Database.

Structural data for the UV carbonate crystals filtered from Inorganic Crystal Structure Database (ICSD, 2012-1, Version 1.8.2, by Fachinformatiionszentrum Karlsruhe). The chosen carbonates satisfy the following two principles: (i) the crystals contain fluorine anions since they are greatly beneficial to the enlargement of energy band gaps in carbonates; and (ii) the A-site cations in crystals are alkaline and alkaline-earth metal cations, and the lightweight metal cations without unclosed *d* or *f* electronic shells since the *d-d* or *f-f* electronic transitions have negative influences to the energy band gap. The noncentrosymmetric crystals are shown in bold-face.

| Sum Formula                                      | Space Group  | Unit Cell Parameters |       |               |              |             |              | ICSD-Code     | Ref. |
|--------------------------------------------------|--------------|----------------------|-------|---------------|--------------|-------------|--------------|---------------|------|
|                                                  |              | a (Å)                | b (Å) | c (Å)         | $\alpha$ (°) | $\beta$ (°) | $\gamma$ (°) |               |      |
| $K_3CO_3F$                                       | R3-CH        | 7.4181               |       | 16.3918       | 90           |             | 120          | 66028         | 2    |
| $Rb_3CO_3F$                                      | R3-CH        | 7.761                |       | 17.412        | 90           |             | 120          | 66029         | 2    |
| $K_2RbCO_3F$                                     | R3-CH        | 7.5225               |       | 16.769        | 90           |             | 120          | 36619         | 3    |
| $KRb_2CO_3F$                                     | R3-CH        | 7.6462               |       | 17.1364       | 90           |             | 120          | 36618         | 3    |
| $Ca_2Ba(CO_3)_2F_2$                              | CMCM         | 12.501               | 5.846 | 9.443         | 90           |             |              | 245746        | 4    |
| $Ca_2CO_3F_2$                                    | PBCN         | 7.65                 | 7.55  | 6.548         | 90           |             |              | 100607        | 5    |
| $Sr_2AlCO_3F_5$                                  | P121/N1      | 5.45                 | 8.704 | 13.15         | 90           | 98.72       | 90           | 201803        | 6    |
| <b><math>NaCa_3(CO_3)_3F_3 \cdot H_2O</math></b> | <b>P32</b>   | <b>6.7180</b>        |       | <b>15.050</b> | <b>90</b>    |             | <b>120</b>   | <b>76858</b>  | 7    |
| <b><math>KCaCO_3F</math></b>                     | <b>P6-M2</b> | <b>5.0968</b>        |       | <b>4.4553</b> | <b>90</b>    |             | <b>120</b>   | <b>262230</b> | 1    |
| <b><math>KSrCO_3F</math></b>                     | <b>P6-M2</b> | <b>5.2598</b>        |       | <b>4.6956</b> | <b>90</b>    |             | <b>120</b>   | <b>262231</b> | 1    |
| <b><math>RbCaCO_3F</math></b>                    | <b>P6-2M</b> | <b>9.1979</b>        |       | <b>4.4463</b> | <b>90</b>    |             | <b>120</b>   | <b>262232</b> | 1    |
| <b><math>RbSrCO_3F</math></b>                    | <b>P6-M2</b> | <b>5.3000</b>        |       | <b>4.7900</b> | <b>90</b>    |             | <b>120</b>   | <b>262233</b> | 1    |
| <b><math>CsCaCO_3F</math></b>                    | <b>P6-2M</b> | <b>9.2999</b>        |       | <b>4.5400</b> | <b>90</b>    |             | <b>120</b>   | <b>262234</b> | 1    |
| <b><math>Cs_3Ba_4(CO_3)_3F_5</math></b>          | <b>P63MC</b> | <b>11.5158</b>       |       | <b>7.6132</b> | <b>90</b>    |             | <b>120</b>   | <b>262235</b> | 1    |

## 6. References in the Supplementary Information.

- 1 Zou, G. H., Ye, N., Huang, L. & Lin, X. S. Alkaline-alkaline earth fluoride carbonate crystals  $ABCO_3F$  (A = K, Rb, Cs; B = Ca, Sr, Ba) as nonlinear optical materials. *J. Am. Chem. Soc.* **133**, 20001-20007 (2011).
- 2 Arlt, J. & Jansen, M. Crystal-growth and X-ray structure determination of the fluoride carbonates  $K_3CO_3F$  and  $Rb_3CO_3F$ . *Z. Naturforsch., Teil B* **45**, 943-946 (1990).
- 3 Albert, B., Arlt, J., Jansen, M. & Ehrhardt, H. Alkali-metal fluoride carbonates. *Z. Anor. Allg. Chem.* **607**, 13-18 (1992).
- 4 Zubkova, N. V., Pushcharovsky, D. Yu, Pekov, I. V. & Rabadanov, M. Kh. The crystal structure of podlesnoite,  $BaCa_2(CO_3)_2F_2$ . *Z. Kristall. – New Cryst. Struct.* **222**, 474-476 (2007).
- 5 Leufer, U. & Tillmanns, E. The crystal-structure of brenkite,  $Ca_2F_2CO_3$ . *Tschermaks mineralogische und Petrographische mitteilungen* **27**, 261-266 (1980).
- 6 Hawthorne, F. C. The crystal-structure of stenorite and the classification of the aluminofluoride minerals. *Can. Mineral.* **22**, 245-251 (1984).
- 7 Grice, J. D., Gault, R. A. & van Velthuisen, J. Brianroulstonite: A new borate mineral with a sheet structure. *Can. Mineral.* **35**, 751-758 (1997).
